# Supplementary material for: Serological Evidence for the Circulation of Ebolaviruses in Pigs From Sierra Leone
Source: Oxford University Press journal article supplement (doi:10.1093/infdis/jiy330), 2018-06-25
Supplement: jiy330_suppl_supplementary_figures.pdf [file jiy330_suppl_supplementary_figures.pdf]

# Supplementary Figure 1

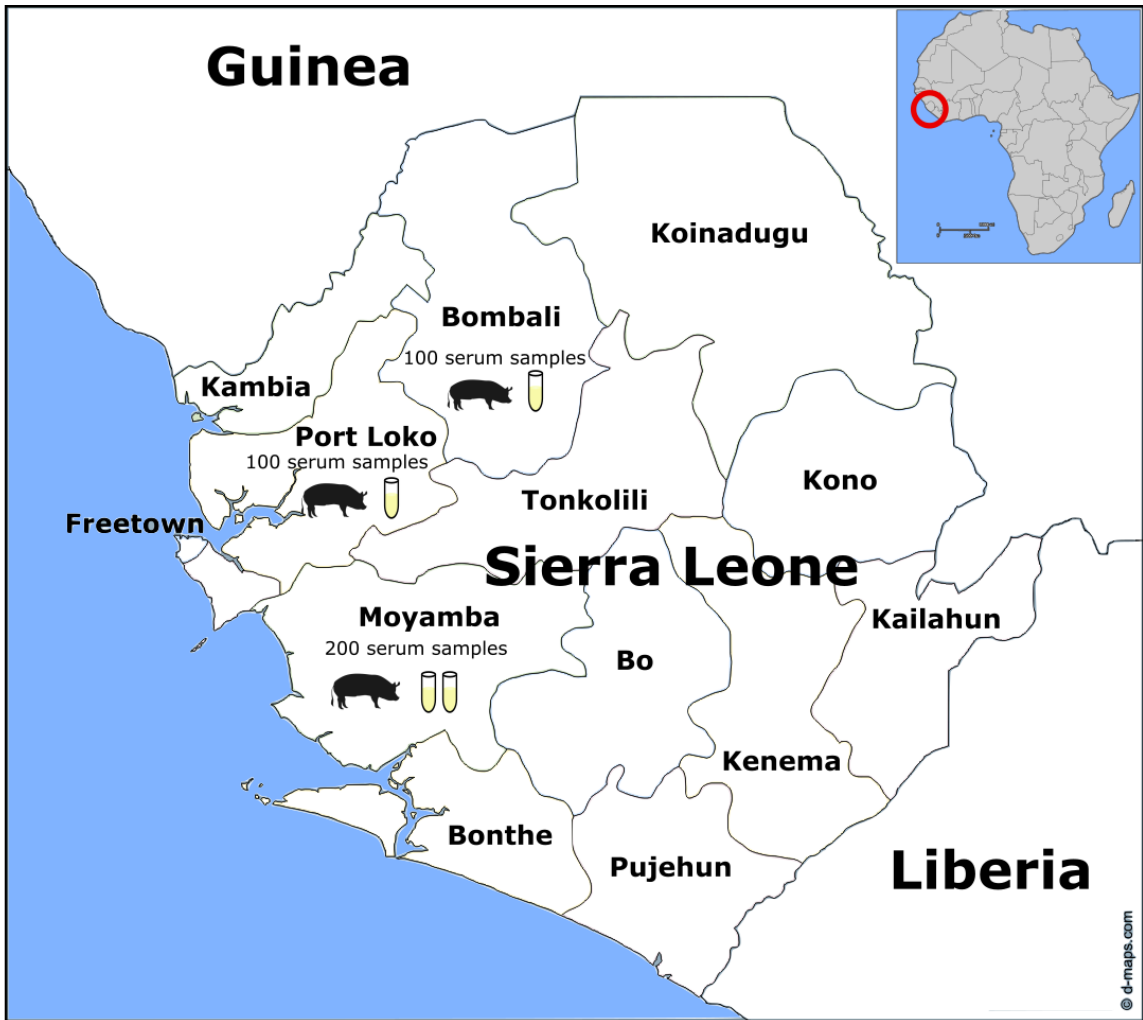

Modified from [http://d-maps.com/carte.php?num\\_car=27765&lang=de](http://d-maps.com/carte.php?num_car=27765&lang=de)

**Supplementary Figure 1.** Map of Sierra Leone indicating the number of porcine serum samples collected per district. Map was modified from [http://d-maps.com/carte.php?num\\_car=27765&lang=de](http://d-maps.com/carte.php?num_car=27765&lang=de).
