# Supplementary material for: Serological Evidence for the Circulation of Ebolaviruses in Pigs From Sierra Leone
Source: Oxford University Press journal article supplement (doi:10.1093/infdis/jiy330), 2018-06-25
Supplement: jiy330_suppl_supplementary_table.docx [file jiy330_suppl_supplementary_table.docx]

**SUPPLEMENTARY TABLE**

| **Serum Sample** | **Sampling Region** | **GPS data** | **Breed** | **Habitat** | **Housing** | **Age** | **Sex** | **ELISA Result** |
| --- | --- | --- | --- | --- | --- | --- | --- | --- |
| SL241 | Bombali | 9.2965° /  -12.2086° | West African Dwarf | community | stationary | > 1 year | m | 0.43 |
| SL246 | Bombali | 9.2965° /  -12.2086° | West African Dwarf | community | stationary | > 1 year | f | 0.17 |
| SL319 | Port Loko | 8.7623° /  -12.7865 ° | Durock | community | free range | > 1 year | m | 0.29 |
| SL380 | Bombali | 8.8567° /  -12.0488° | multiple crosses | farm (bush) | stationary | > 1 year | f | 0.78 |

**Supplementary Table 1.** Additional background information on ELISA positive porcine serum samples from Sierra Leone (SL). GPS data are given for latitude/longitude. m = male; f = female.
